# Supplementary material for: Tumor Extracellular Vesicles Regulate Macrophage-Driven Metastasis through CCL5
Source: MDPI journal article supplement (doi:10.3390/cancers13143459), 2021-07-10
Supplement: s1 [file Figure S1.pdf › Figure S1.pdf]

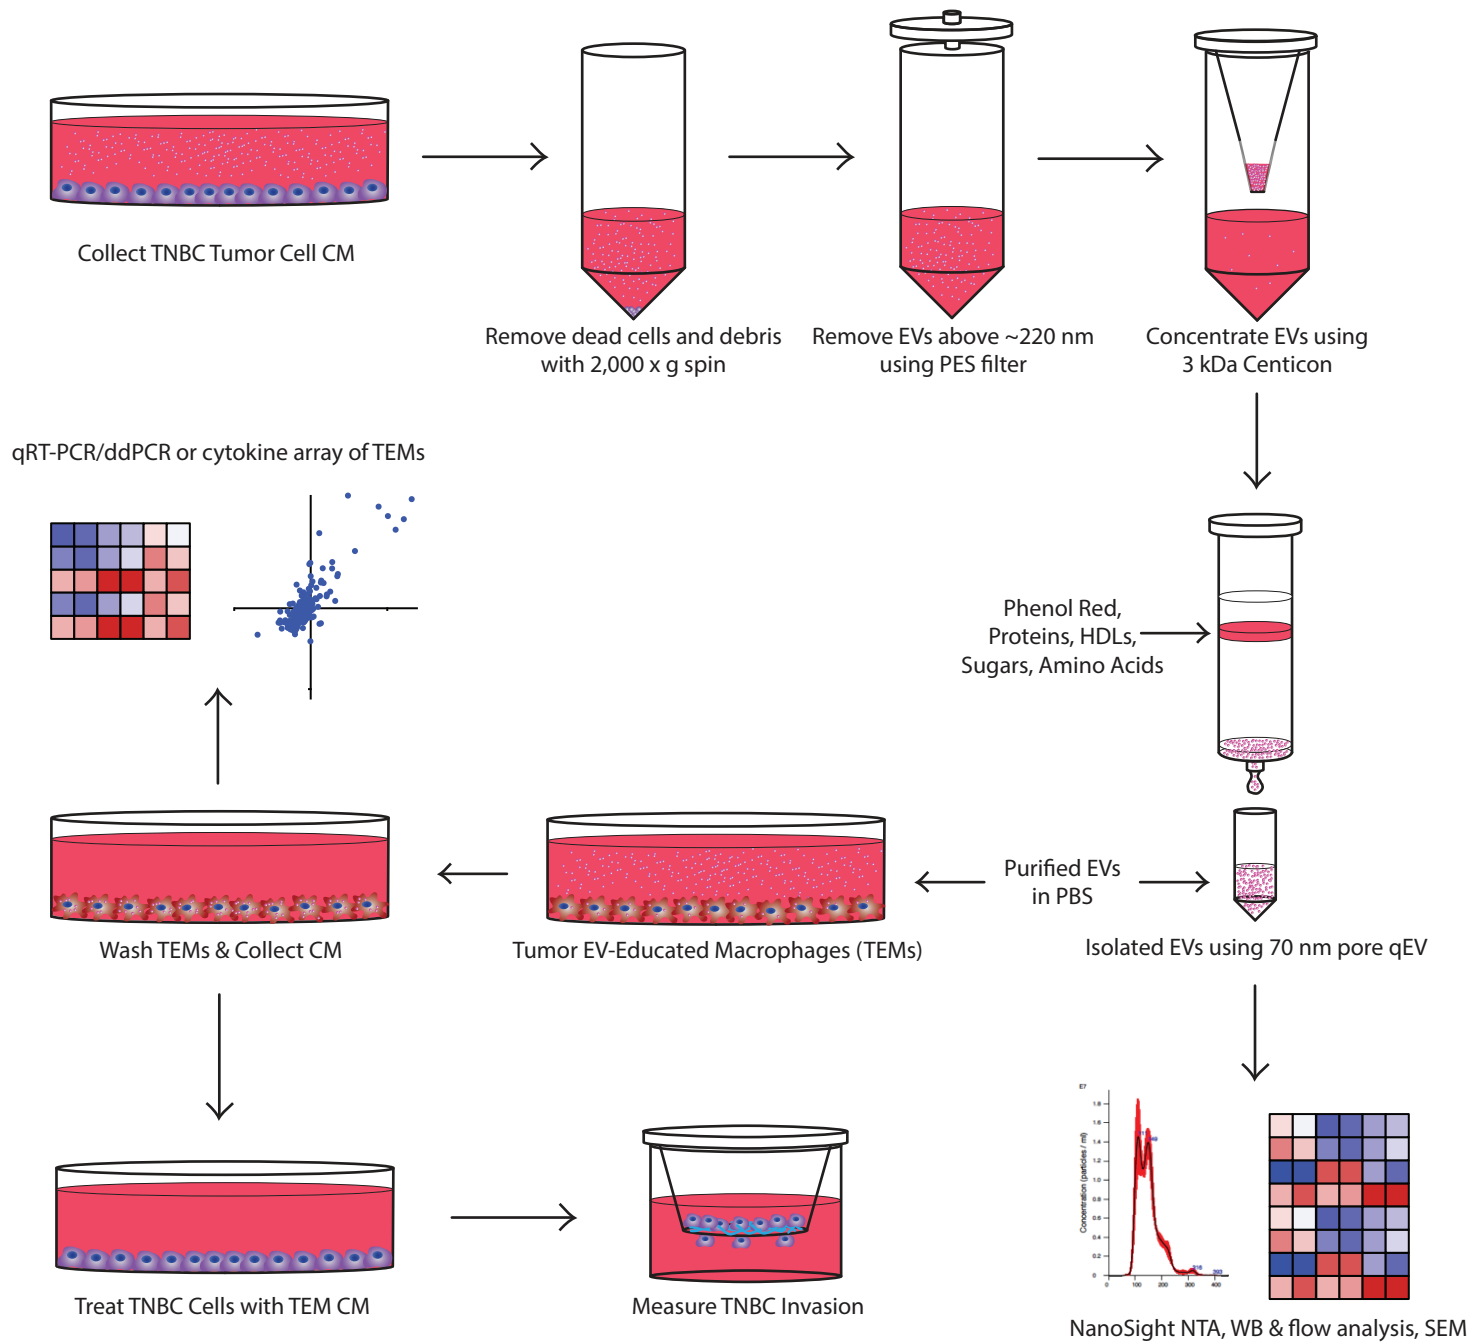

**Figure S1:** Schematic describing our experimental design for *in vitro* EV analysis:

- EV isolation method from TNBC CM using qEV columns
- EV analysis using NanoSight NTA as well immunoblot, flow, and SEM
- TEM programming with isolated EVs
- Gene expression analysis of TEMs using qRT-PCR/ddPCR or cytokine arrays
- Effect of TEM CM on tumor cell invasion
