# Supplementary material for: Tumor Extracellular Vesicles Regulate Macrophage-Driven Metastasis through CCL5
Source: MDPI journal article supplement (doi:10.3390/cancers13143459), 2021-07-10
Supplement: s1 [file Figure S3.pdf › Figure S3.pdf]

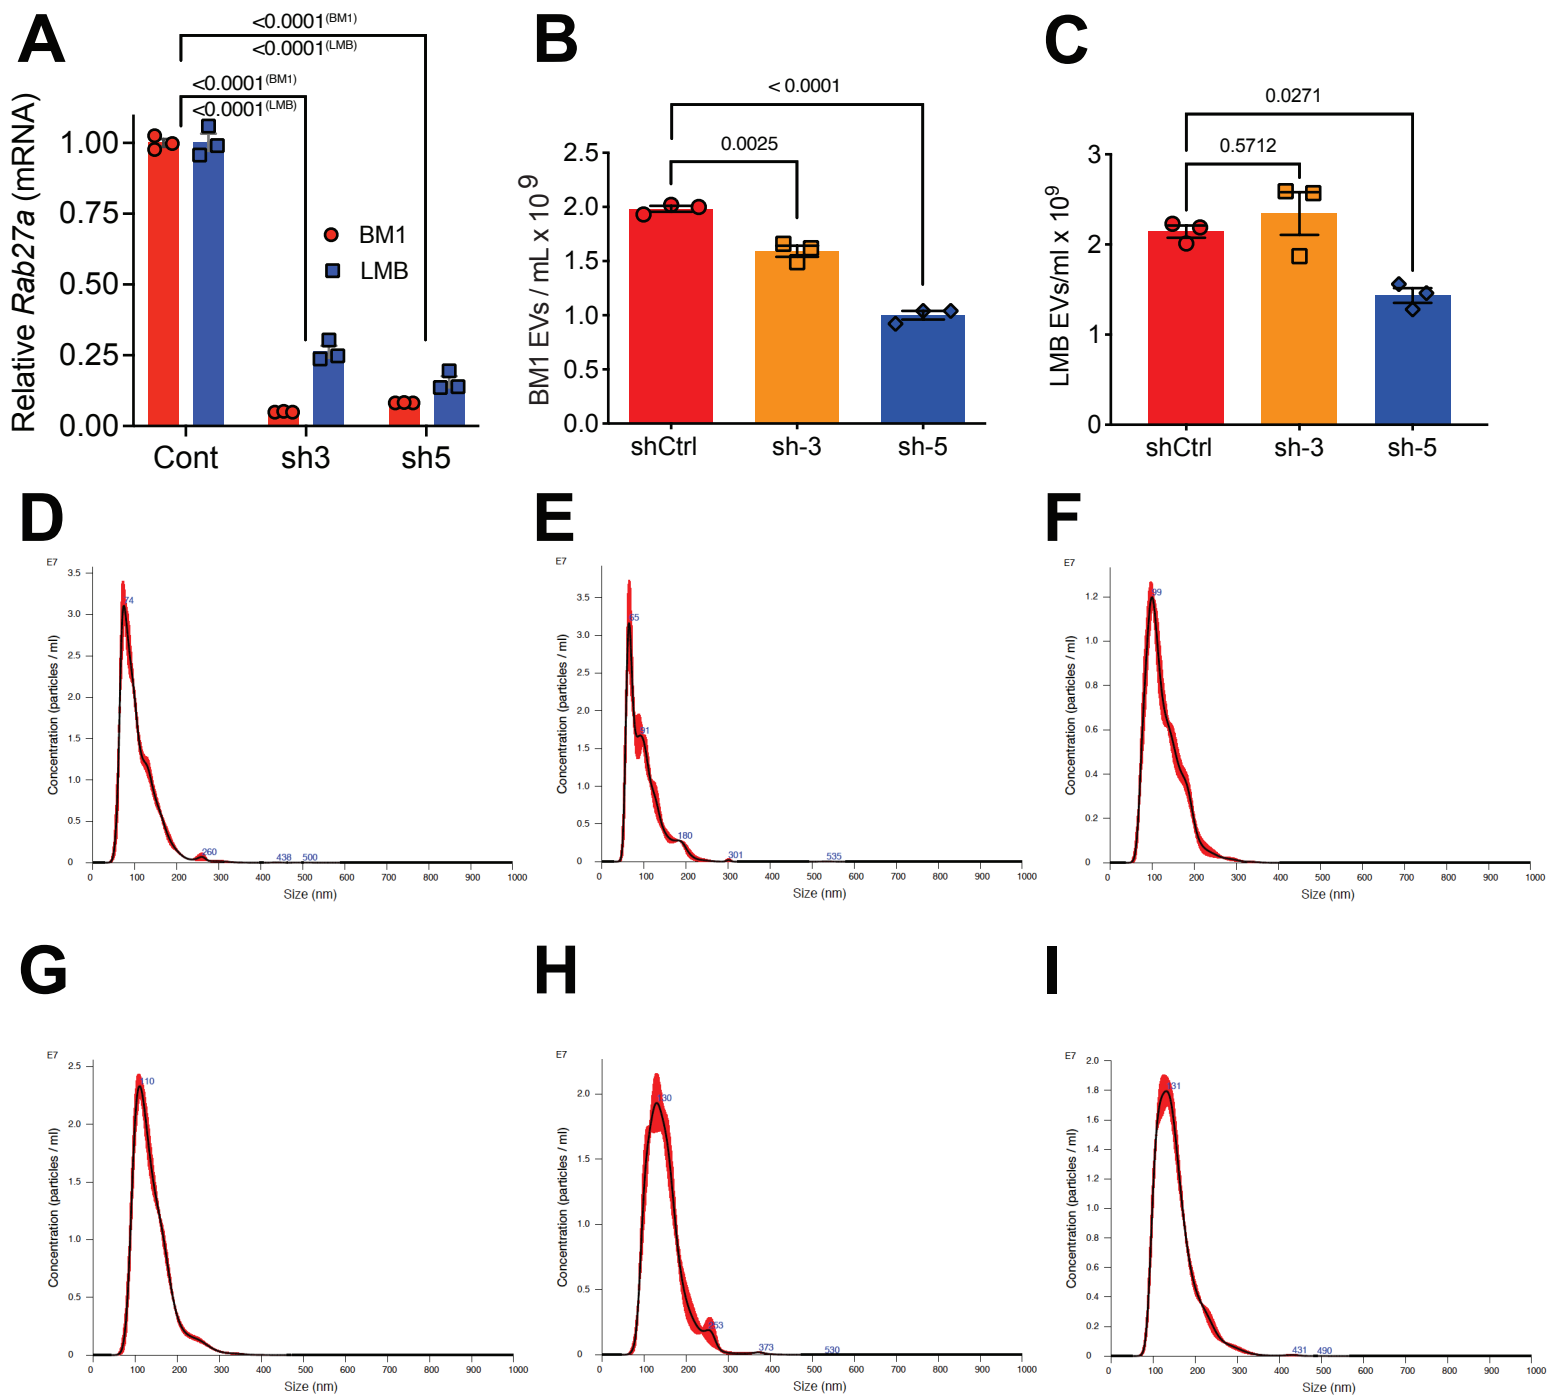

**Figure S3: Reduction in EV secretion in BM1 and LMB cells upon Rab27a Knock-Down** **A)** Mean +/- SEM of *Rab27a* in BM1 and LMB cells from vector control (Ctrl), shRab27a (sh-3), and shRab27a (sh-5). P-values calculated using a one-way ANOVA. **B)** Mean +/- SEM of EV concentration in BM1 cells from vector control (shCtrl, red), shRab27a (sh-3, orange), and shRab27a (sh-5, blue). P-values calculated using a one-way ANOVA. **C)** Mean +/- SEM of EV concentration in LMB shRab27a cells from shControl (black), sg-3 (orange), and sg-5 (blue). P-values calculated using a one-way ANOVA. **(D-F)** Representative nanosight graphs of EV concentrations and size in BM1 shRab27a serum free cell media after a 2,000 x g spin and 220 um filter for each cell type expressing either shCtrl **(D)**, sh-3 **(E)**, or sh-5 **(F)**. **(G-I)** Representative nanosight graphs of EV concentrations and size in LMB shRab27a cell serum free media after a 2,000 x g spin and 220 um filter for each cell type expressing either shCtrl **(G)**, sh-3 **(H)**, or sh-5 **(I)**.
