# Supplementary material for: Tumor Extracellular Vesicles Regulate Macrophage-Driven Metastasis through CCL5
Source: MDPI journal article supplement (doi:10.3390/cancers13143459), 2021-07-10
Supplement: s1 [file Figure S4.pdf › Figure S4.pdf]

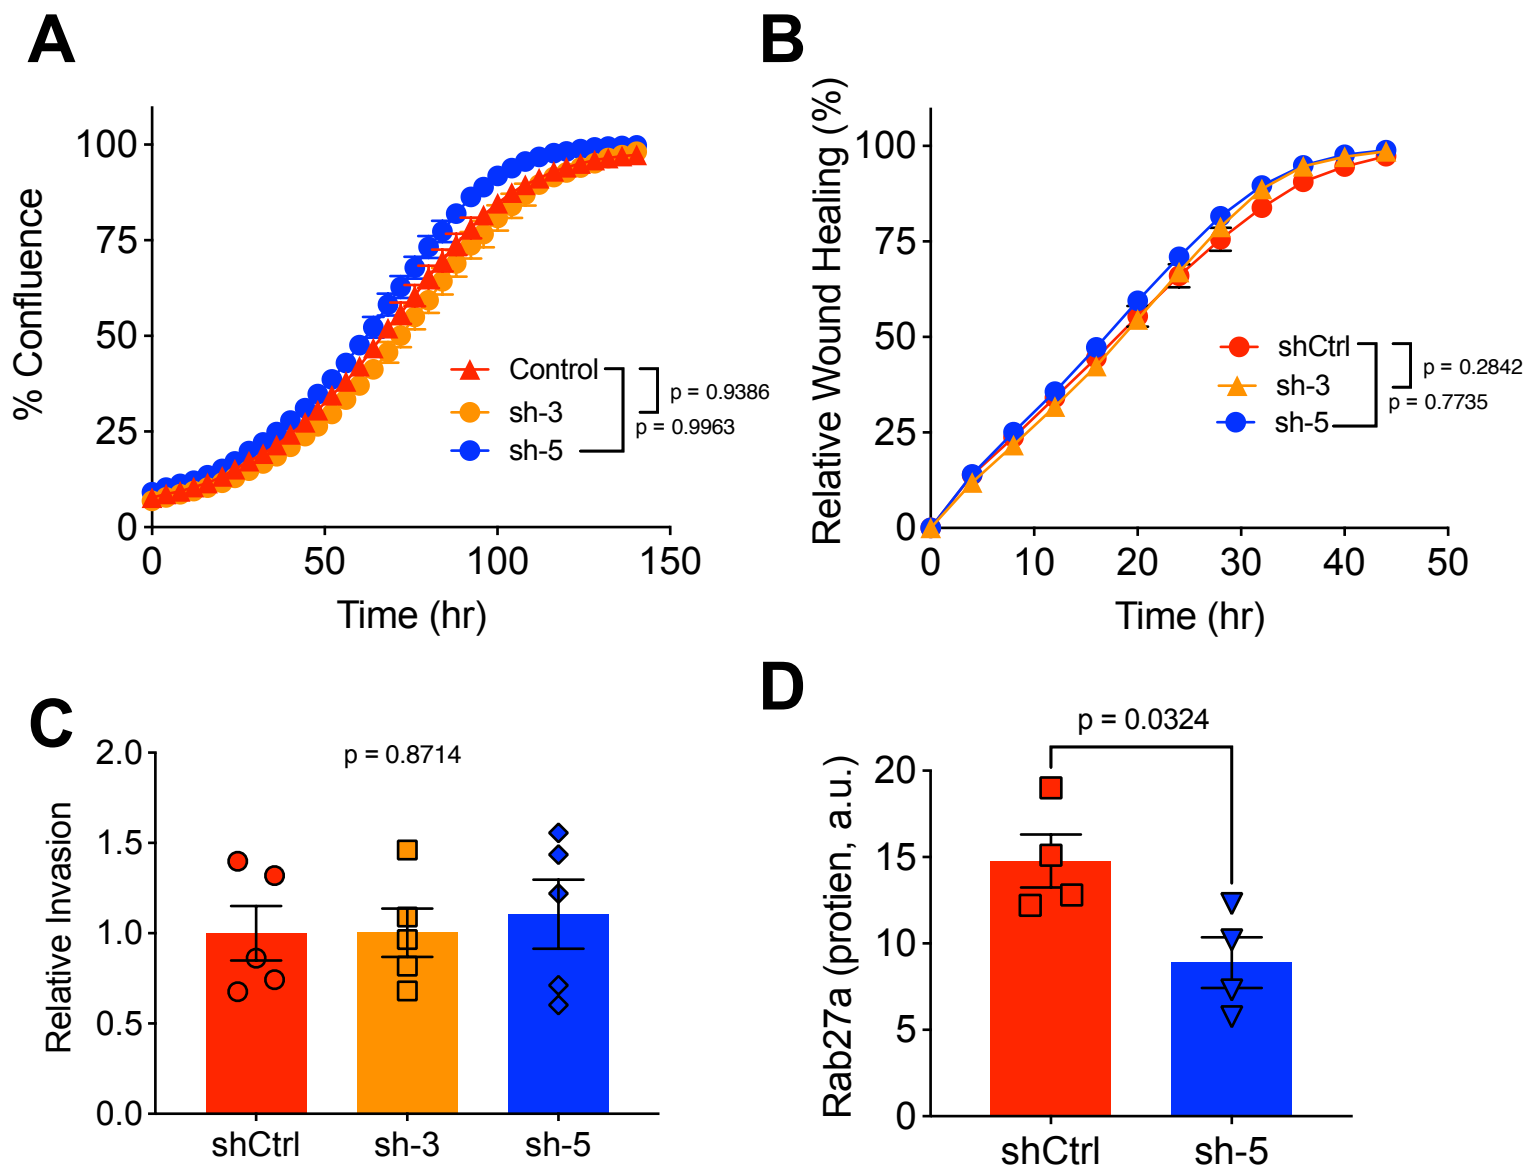

**Figure S4: Rab27a Knock-Down in BM1 cells does not alter tumor growth, migration, or invasion** **A)** Growth rates of BM1 shRab27a tumor cells. p-value shown for two-way ANOVA (N=16, individual points unavailable). **B)** Wound healing/migration in BM1 shRab27a cells. p-value shown for two-way ANOVA (N=16, individual points unavailable). **C)** Relative invasion in BM1 shRab27a tumor cells. p-value shown for one-way ANOVA between shCtrl, sh3, and sh5 (N=5). **D)** Rab27a levels normalized to tubulin in BM1 tumors from Control and shRab27a (N=4).
