# Supplementary material for: Tumor Extracellular Vesicles Regulate Macrophage-Driven Metastasis through CCL5
Source: MDPI journal article supplement (doi:10.3390/cancers13143459), 2021-07-10
Supplement: s1 [file Figure S5.pdf › Figure S5.pdf]

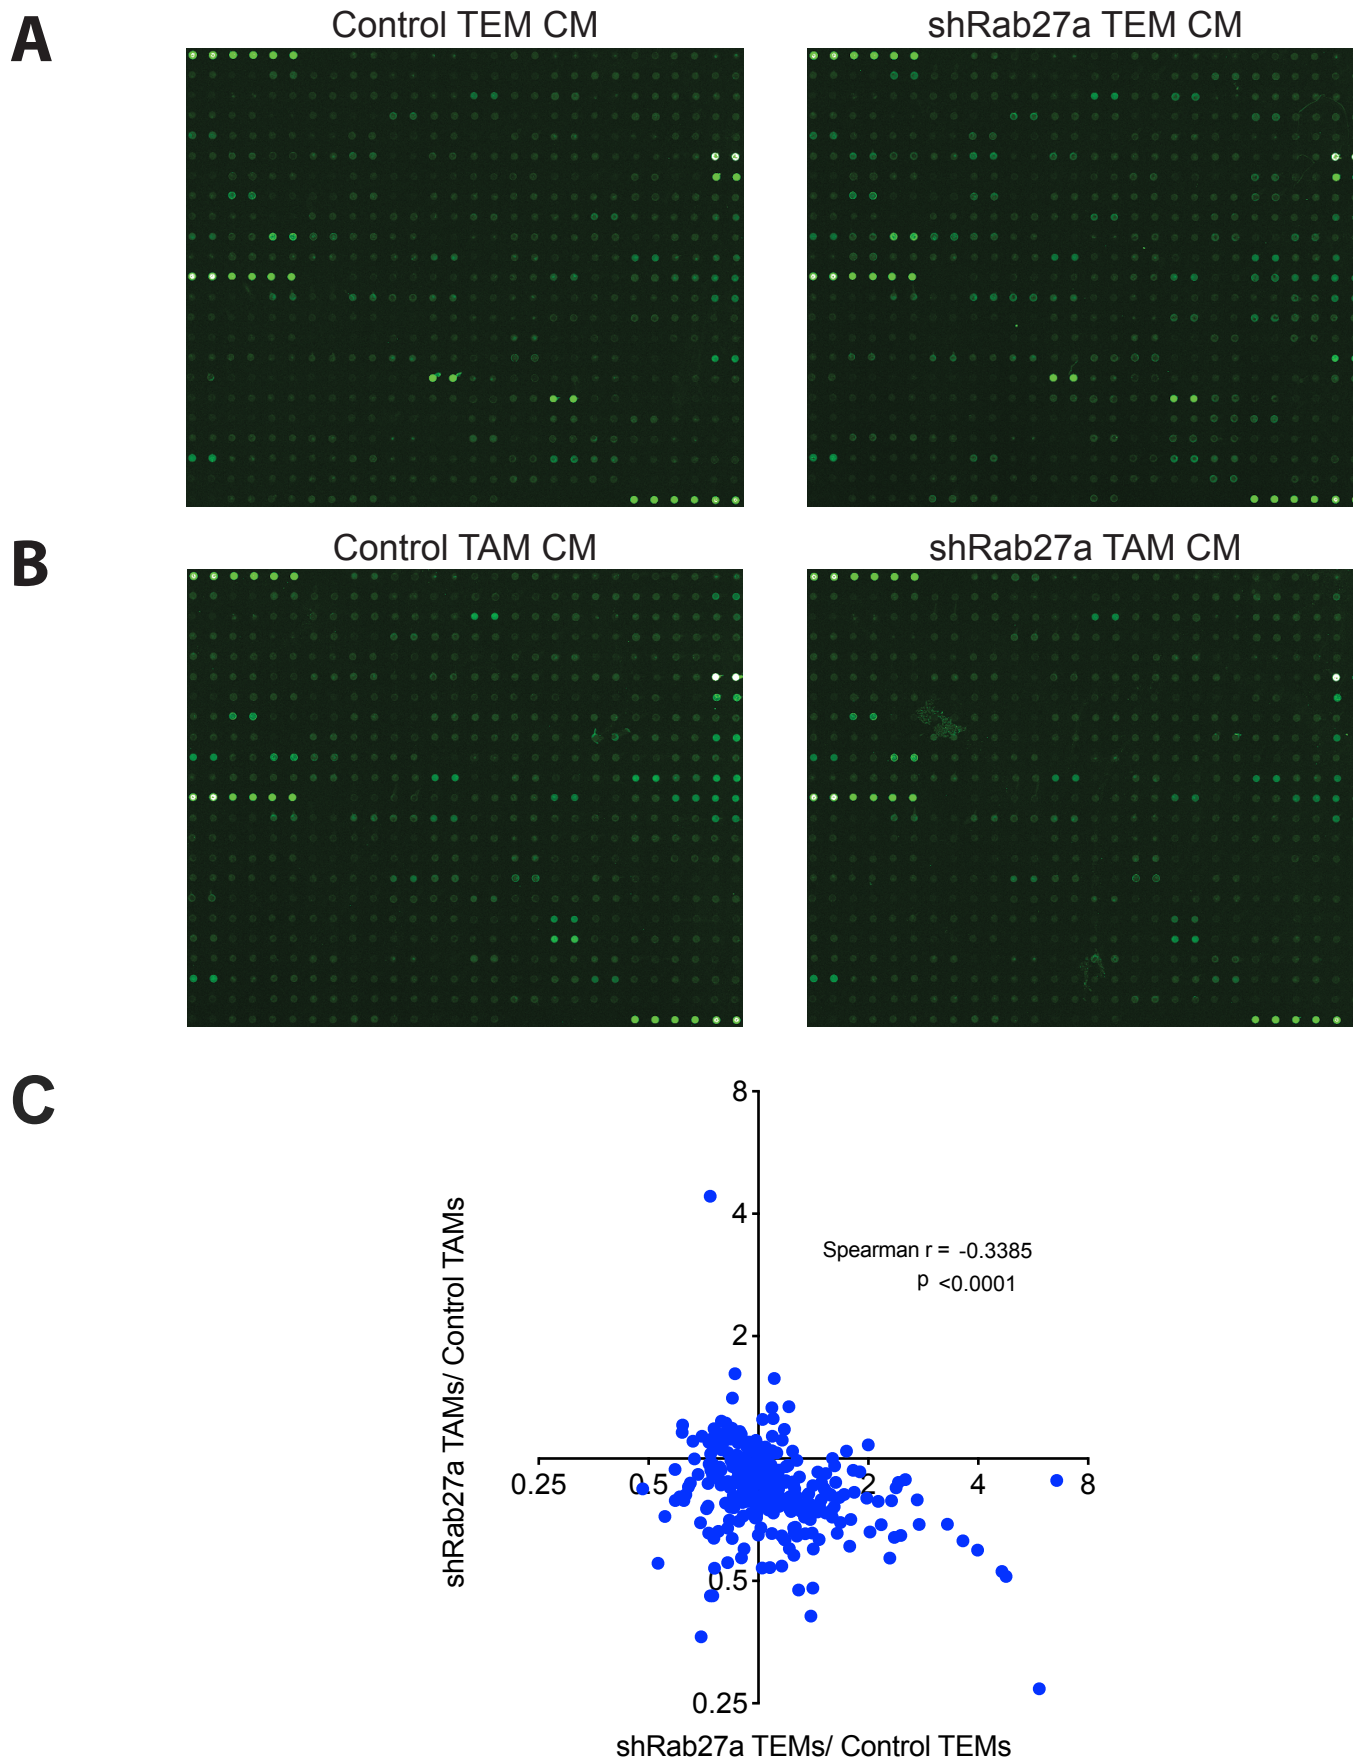

**Figure S5: Cytokine array analysis of EV-programmed macrophages produced from control and shRab27a tumor cells (A-B)** RayBiotech L308 cytokine array raw images for control and shRab EV programmed TEMs **(A)** and control and shRab TAM samples **(B)**. **(C)** Spearman correlations and corresponding p values shown for correlations between differential expression of shRab27a / Control TEMs to shRab27a / Control TAMs.
