# Supplementary material for: Tumor Extracellular Vesicles Regulate Macrophage-Driven Metastasis through CCL5
Source: MDPI journal article supplement (doi:10.3390/cancers13143459), 2021-07-10
Supplement: s1 [file Figure S7.pdf › Figure S7.pdf]

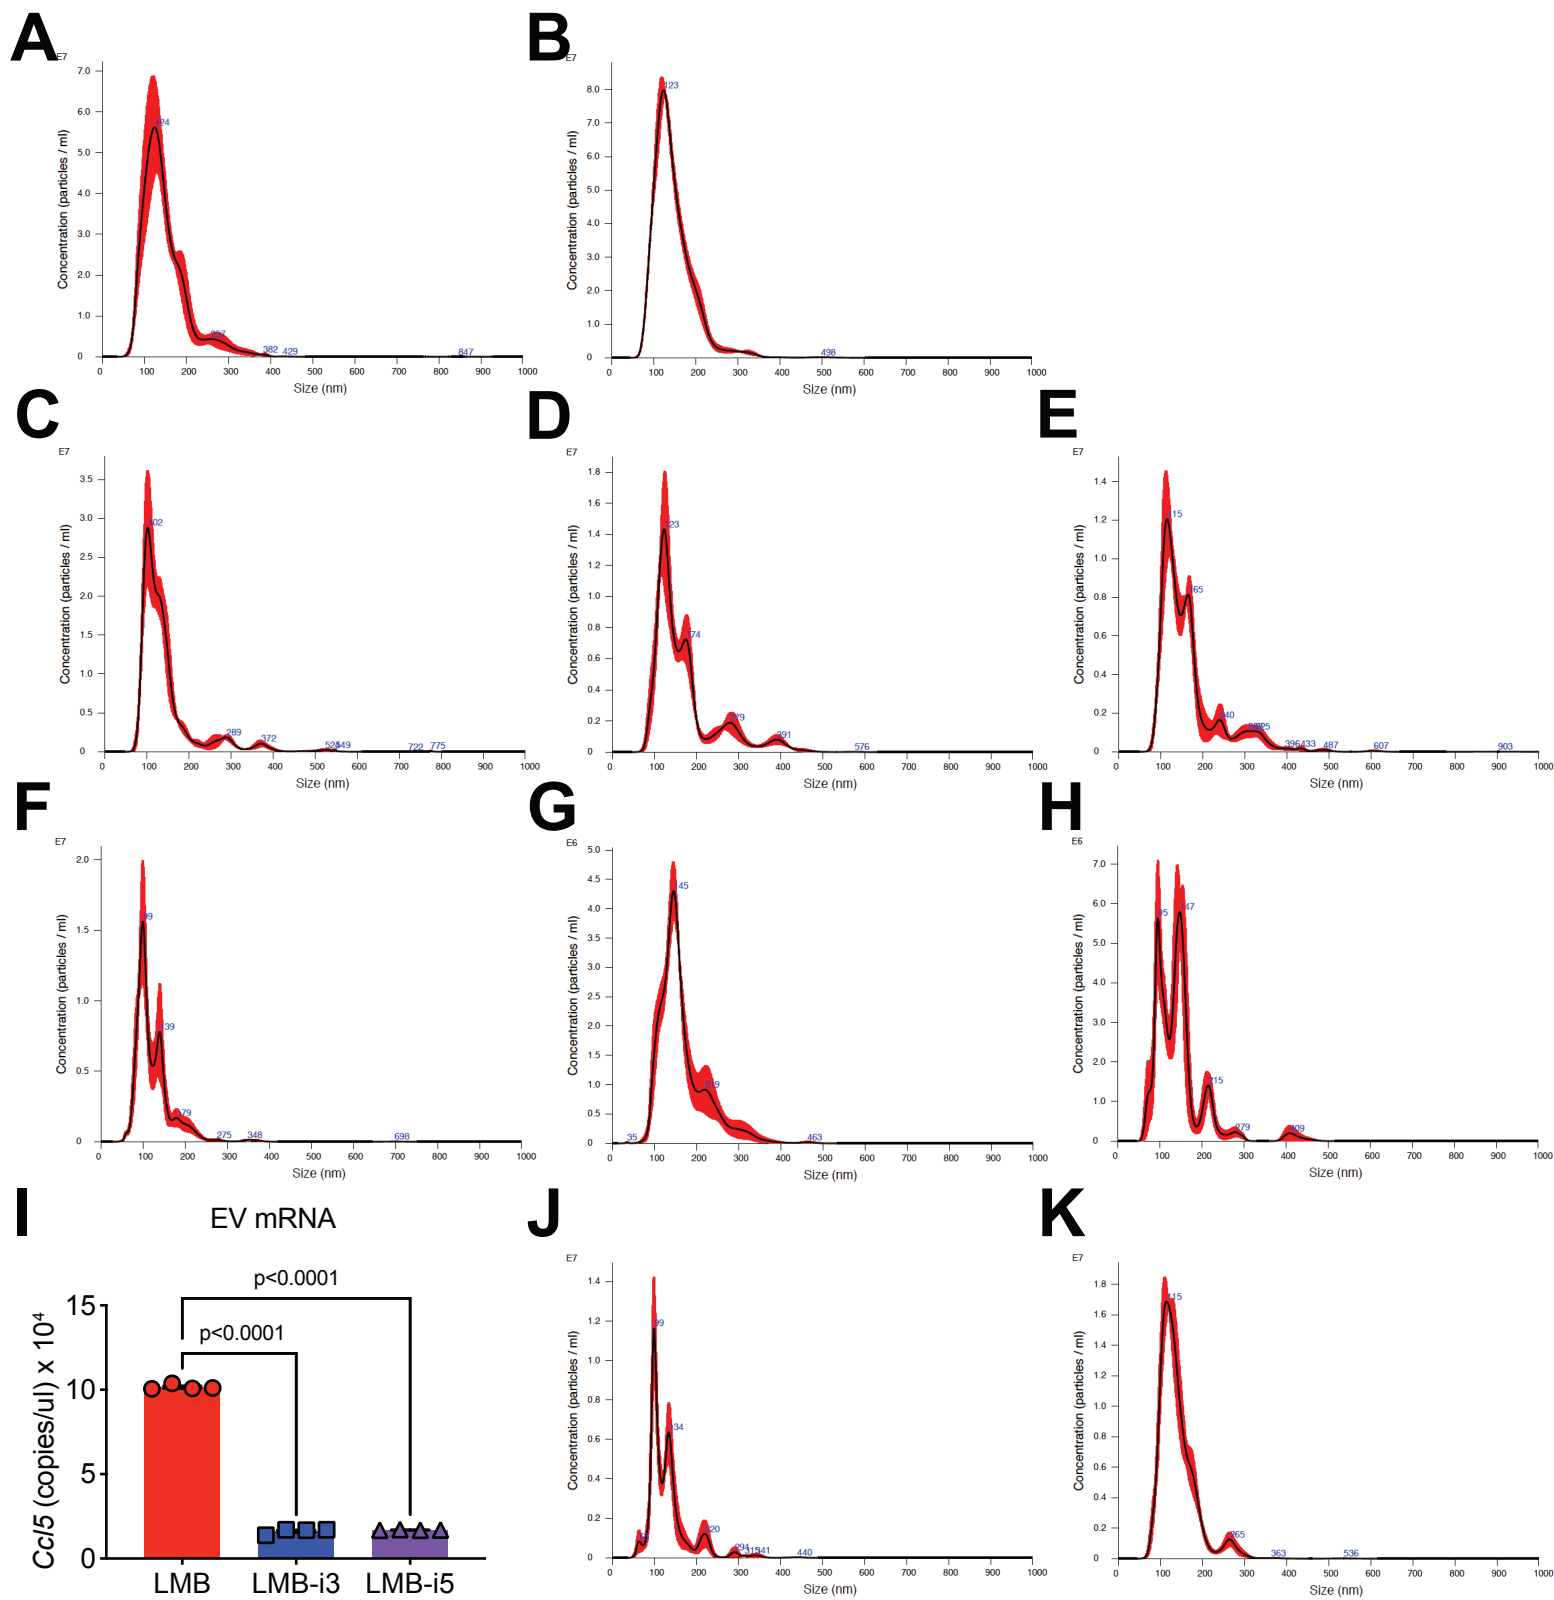

**Figure S7: CCL5 regulates EV secretion in BM1 and LMB tumor cells (A-B)** Representative nanosight graphs of EV concentrations and size in BM1 cell media after a 2,000 x g spin and 220 um filter for each cell type, control (A) and *CCL5* (B). (C-E) Representative nanosight graphs of EV concentrations and size in BM1 dCas9 cell media after a 2,000 x g spin and 220 um filter for each cell type, sg-control (C), sg-*CCL5*-2 (E), and sg-*CCL5*-3 (E). (F-H) Representative nanosight graphs of EV concentrations and size in LMB dCas9-KRAB cell media after a 2,000 x g spin and 220 um filter for each cell type, sg-control (F), sg-*Ccl5*-i3 (G), and sg-*Ccl5*-i5 (H). I) *Ccl5* mRNA in LMB dCas9-KRAB cell EVs with sg-control (red), sg-*Ccl5*-i3 (blue), and sg-*Ccl5*-i5 (purple). (J-K) Representative nanosight graphs of EV concentrations and size in LMB dCas9-VPR cell media after a 2,000 x g spin and 220 um filter for each cell type, sg-control (J) and sg-*Ccl5*-a5 (K).
