# Supplementary material for: Tumor Extracellular Vesicles Regulate Macrophage-Driven Metastasis through CCL5
Source: MDPI journal article supplement (doi:10.3390/cancers13143459), 2021-07-10
Supplement: s1 [file Figure S8.pdf › Figure S8.pdf]

**A**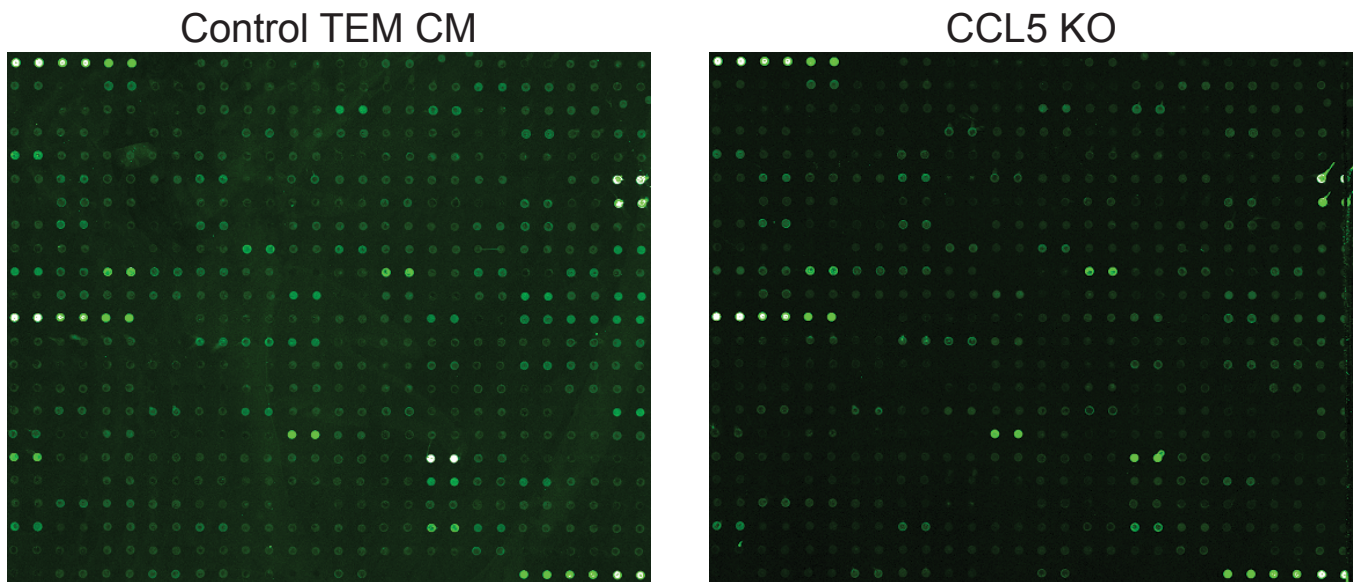**B**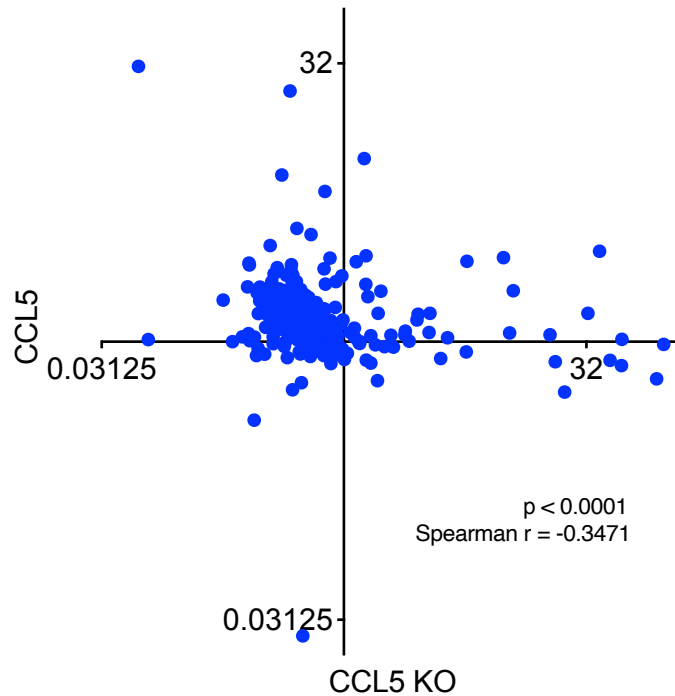

**Figure S8: Cytokine array analysis of macrophages programmed with either control or CCL5-Knock-Down EVs (A)** RayBiotech L308 cytokine array raw images for control and CCL5 KO EV programmed TEMs **(B)** Spearman correlations and corresponding p values shown for correlation between differential expression of CCL5 KO / Control TEMs to CCL5 / Control TAMs [previously published dataset]
