# Supplementary material for: Tumor Extracellular Vesicles Regulate Macrophage-Driven Metastasis through CCL5
Source: MDPI journal article supplement (doi:10.3390/cancers13143459), 2021-07-10
Supplement: s1 [file Figure S9.pdf › Figure S9.pdf]

**A**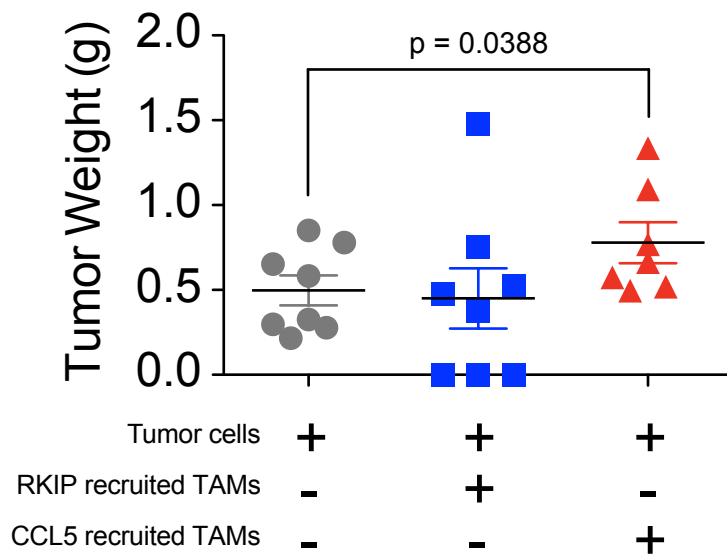**B**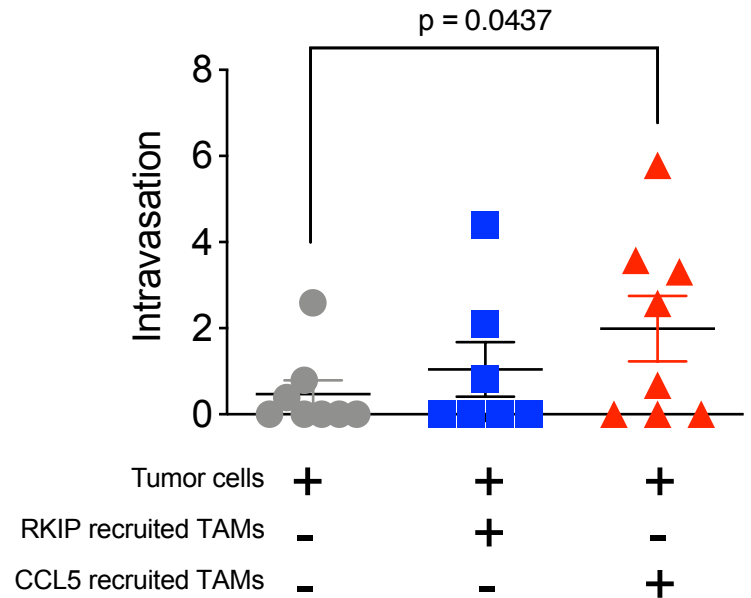

**Figure S9: CCL5 recruited TAMs increase both tumor cell growth and metastasis** Data shown are from tumors injected into the fatpad of athymic nude mice with or without TAMs from the denoted type of tumor. **A)** Final tumor weights between control tumors (N=8) and those co-injected with RKIP-derived (N=8) or CCL5-derived TAMs (N=7). **B)** Intravasation of tumor cells into the blood stream in control tumors (N=8) and those co-injected with RKIP-derived (N=7) or CCL5-derived TAMs (N=8).
