# Supplementary material for: Tumor Extracellular Vesicles Regulate Macrophage-Driven Metastasis through CCL5
Source: MDPI journal article supplement (doi:10.3390/cancers13143459), 2021-07-10
Supplement: s1 [file Figure S11.pdf › Figure S11.pdf]

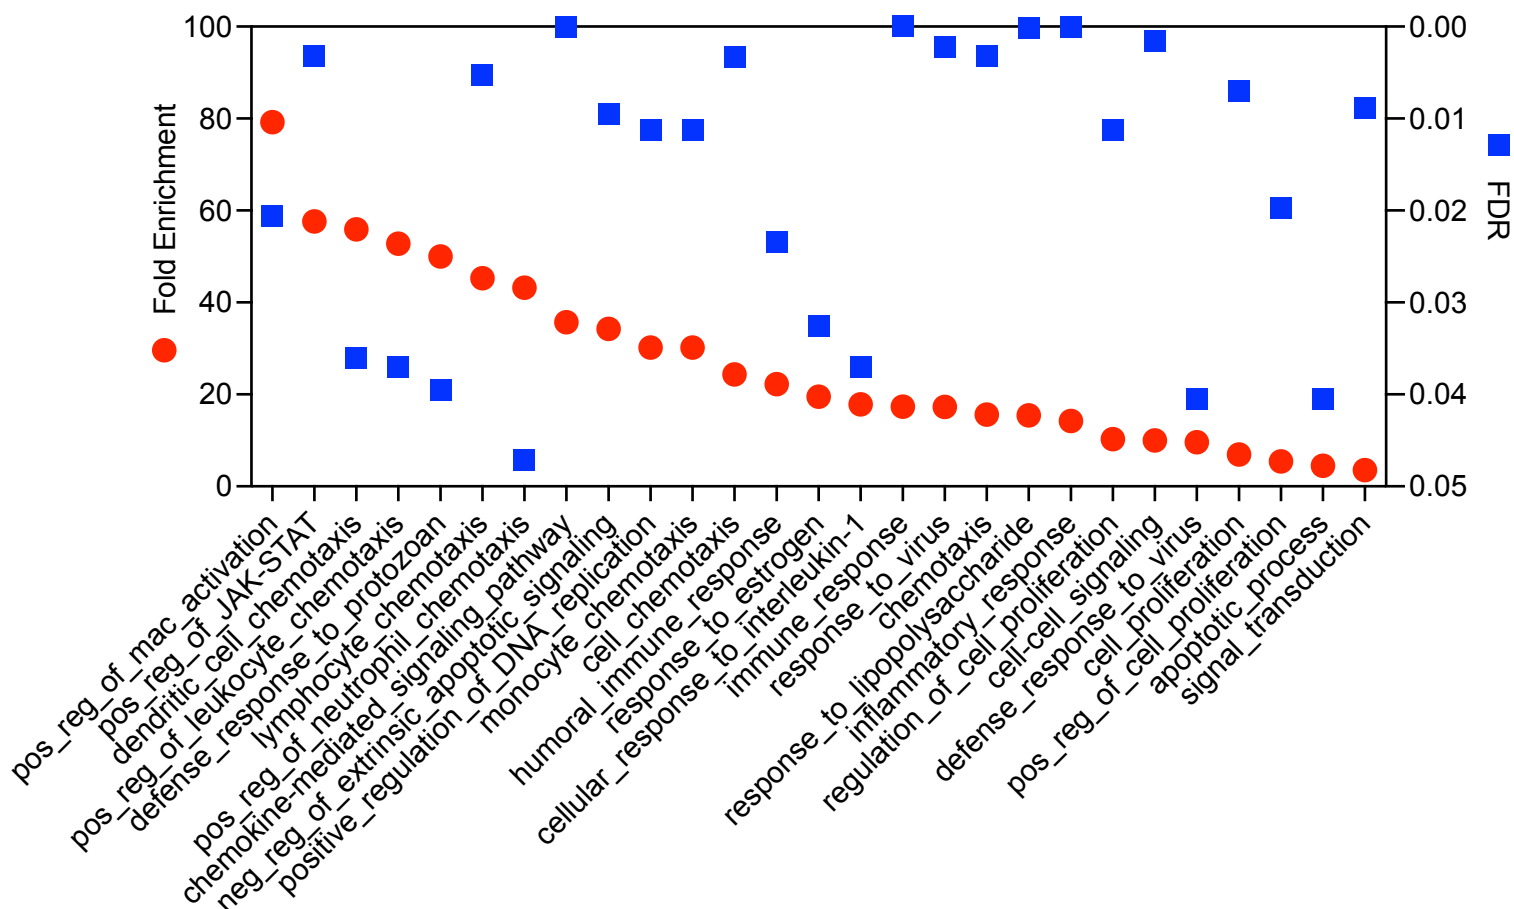

**Figure S12: DAVID analysis macrophage genes regulated by EV programming and tumor CCL5 expression** Shown in red are the number of genes out of the set of 50 enriched per category; shown in blue are the -log p-value of enrichment for each category. Only categories with greater than 10 genes are shown; the top 23 categories are shown.
