# Supplementary material for: Tumor Extracellular Vesicles Regulate Macrophage-Driven Metastasis through CCL5
Source: MDPI journal article supplement (doi:10.3390/cancers13143459), 2021-07-10
Supplement: s1 [file Table S1.pdf › Table S1.pdf]

|                     | CCL5 KO / TEM | shRab27a (TAM) | Human Orthologue |
|---------------------|---------------|----------------|------------------|
| 6Ckine_             | 0.428         | 0.655374068    | CCL21            |
| Activin_C           | 0.366         | 0.630317579    | INHBC            |
| AgRP                | 0.543         | 0.72145277     | AGRP             |
| ALCAM               | 0.309         | 0.675318159    | ALCAM            |
| AR_(Amphiregulin)   | 0.545         | 0.648836338    | AREG             |
| BCMA_/_TNFRSF17     | 0.387         | 0.644563246    | TNFRSF17         |
| CCR10               | 0.444         | 0.677991393    | CCR10            |
| CD11b               | 0.472         | 0.655046439    | ITGAM            |
| CD30_L              | 0.388         | 0.713990936    | TNFSF8           |
| CTACK_              | 0.617         | 0.74534265     | CCL27            |
| CXCR4               | 0.326         | 0.746808333    | CXCR4            |
| DR3_/_TNFRSF25      | 0.397         | 0.674791433    | TNFRSF25         |
| E-Selectin          | 0.546         | 0.653453773    | SELE             |
| Eotaxin_            | 0.456         | 0.734390677    | CCL11            |
| FAM3B               | 0.461         | 0.59966362     | FAM3B            |
| GDF-3               | 0.619         | 0.636247242    | GDF3             |
| GM-CSF              | 0.482         | 0.734235283    | CSF2             |
| IFN-alpha_/_beta_R2 | 0.526         | 0.700998295    | IFNAR2           |
| IFN-beta            | 0.343         | 0.658557013    | IFNB1            |
| IFN-gamma_          | 0.397         | 0.741838408    | IFNG             |
| IGFBP-2             | 0.674         | 0.631671981    | IGFBP2           |
| IL-1_alpha          | 0.394         | 0.578353313    | IL1A             |
| IL-1_R4_/_ST2       | 0.597         | 0.717654175    | IL1RL1           |
| IL-11               | 0.658         | 0.695898858    | IL11             |
| IL-12_p40/p70       | 0.419         | 0.750468292    | IL12             |
| IL-13               | 0.618         | 0.479993906    | IL13             |
| IL-16               | 0.614         | 0.64691716     | IL16             |
| IL-17               | 0.406         | 0.741049881    | IL17             |
| IL-21_R             | 0.061         | 0.539361574    | IL21R            |
| IL-27               | 0.467         | 0.569365157    | IL27             |
| IL-28_/_IFN-lambda  | 0.605         | 0.708383954    | IFNL1            |
| IL-31               | 0.578         | 0.639991875    | IL31             |
| IL-4_R              | 0.374         | 0.7342391      | IL4R             |
| IL-5                | 0.439         | 0.633675102    | IL5              |
| IL-5_R_alpha        | 0.356         | 0.600459112    | IL5RA            |
| IL-6                | 0.368         | 0.598692437    | IL6              |
| IL-7                | 0.363         | 0.733081602    | IL7              |
| LIGHT_/_TNFSF14     | 0.259         | 0.459686472    | TNFSF14          |
| LIX                 | 0.725         | 0.688491259    | CXCL5            |
| LRP-6               | 0.473         | 0.6452092      | LRP6             |
| MCP-5               | 0.605         | 0.655719424    | CCL12            |
| MFG-E8              | 0.203         | 0.705591042    | MFGE8            |
| MIP-1_gamma         | 0.257         | 0.608784351    | CCL15            |
| MIP-2               | 0.345         | 0.474949903    | CXCL2            |
| MIP-3_beta_         | 0.358         | 0.554783655    | CCL19            |
| MMP-24_/_MT5-MMP    | 0.293         | 0.538162659    | MMP24            |
| Neuregulin-3_/_NRG3 | 0.417         | 0.67419472     | NRG3             |
| Osteopontin         | 0.053         | 0.56993669     | SPP1             |
| P-Selectin          | 0.286         | 0.27138117     | SELP             |
| PF-4                | 0.750         | 0.627192038    | PF4              |
| Prolactin           | 0.515         | 0.527435165    | PRL              |
| RELM_beta           | 0.511         | 0.722290232    | RETNLB           |
| SDF-1               | 0.277         | 0.409840951    | SDF1             |
| Serum_Amyloid_A1    | 0.374         | 0.717918943    | SAA1             |
| SLPI                | 0.187         | 0.537423694    | SLPI             |
| TGF-beta_3          | 0.744         | 0.71999086     | TGFB3            |
| TGF-beta_RII        | 0.643         | 0.730471739    | TGFBR2           |
| TLR1                | 0.327         | 0.715817       | TLR1             |
